# Supplementary material
Source: PubMed Central journal article supplement (PMC3208141)
Supplement: 11-7633_z7g999112030sf01.pdf [file 11-7633_z7g999112030sf01.pdf]

Supplementary Figure S1

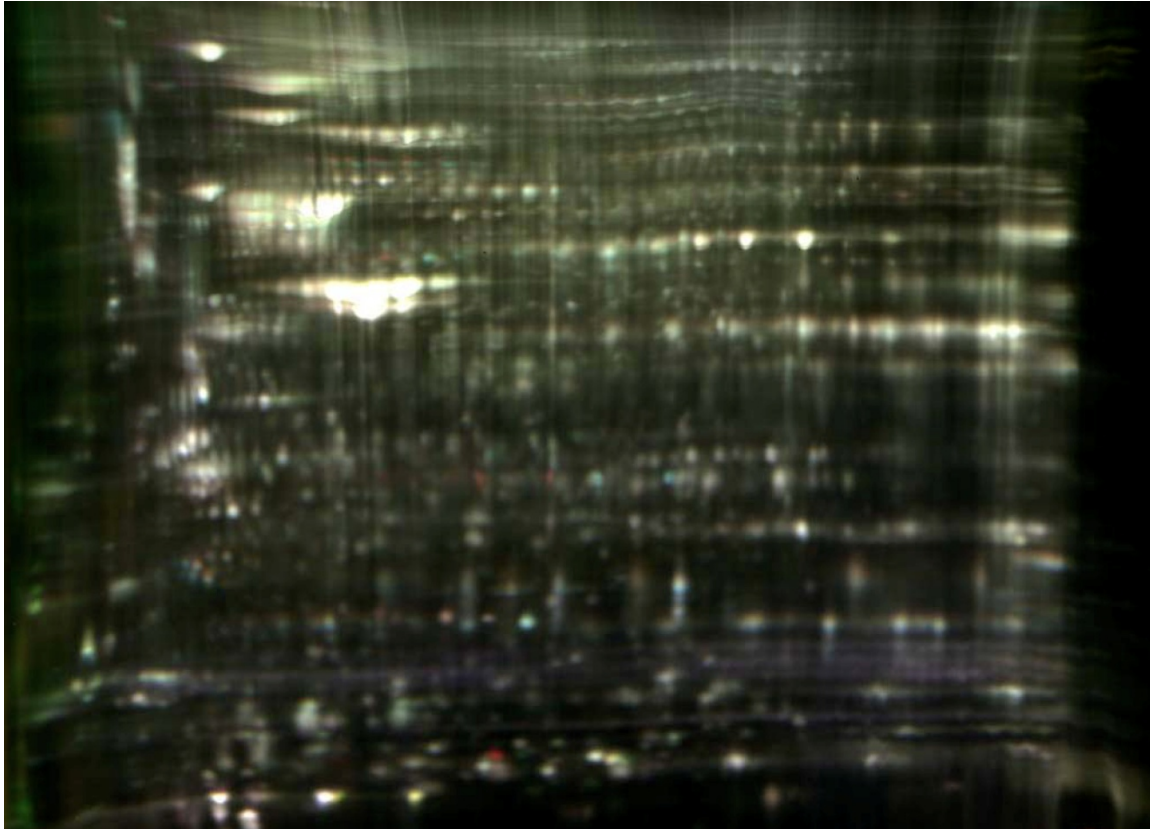

**Supplementary Figure S1.** Analysis of changes in lens epithelial cell proteins following UVB exposure. HLE B-3 cells were exposed to  $768 \text{ mJ/cm}^2$  of UVB radiation at 302 nm and then incubated in culture medium for 4 hours. This image represents a 2D gel of cyanide dye-labeled proteins from control HLE B-3 cells (C1) labeled with Cy2, control C2 labeled with Cy3, and UVB-exposed HLE B-3 cells labeled with Cy5. Proteins were identified by MS/MS analysis and Mascot search of spots that were differentially expressed. Quantitative image analysis data for identified proteins from this gel are given in Table 1.
