# Supplementary material
Source: PubMed Central journal article supplement (PMC3208141)
Supplement: 11-7633_z7g999112030sf03.pdf [file 11-7633_z7g999112030sf03.pdf]

**Supplementary Figure S3.** Ingenuity networks created for proteins whose expression was changed by UVB irradiation of human lens epithelial cell cultures and intact postmortem human lenses. The legends for the symbols are shown in the second slide. Networks 1-4 represent the position of the proteins in four different cellular networks.

# Legends for Ingenuity networks

## Network Shapes

-  Chemical or Drug
-  Cytokine
-  Enzyme
-  G-protein Coupled Receptor
-  Group or Complex
-  Growth Factor
-  Ion Channel
-  Kinase
-  Ligand-dependent Nuclear Receptor
-  Peptidase
-  Phosphatase
-  Transcription Regulator
-  Translation Regulator
-  Transmembrane Receptor
-  Transporter
-  Other

## Relationships

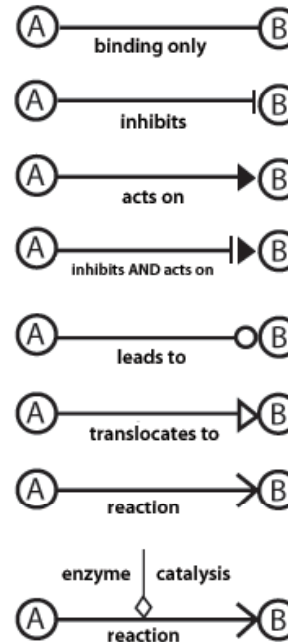

—————  
direct interaction

-----  
indirect interaction

Note: "Acts on" and "inhibits" edges may also include a binding event.

# Network # 1

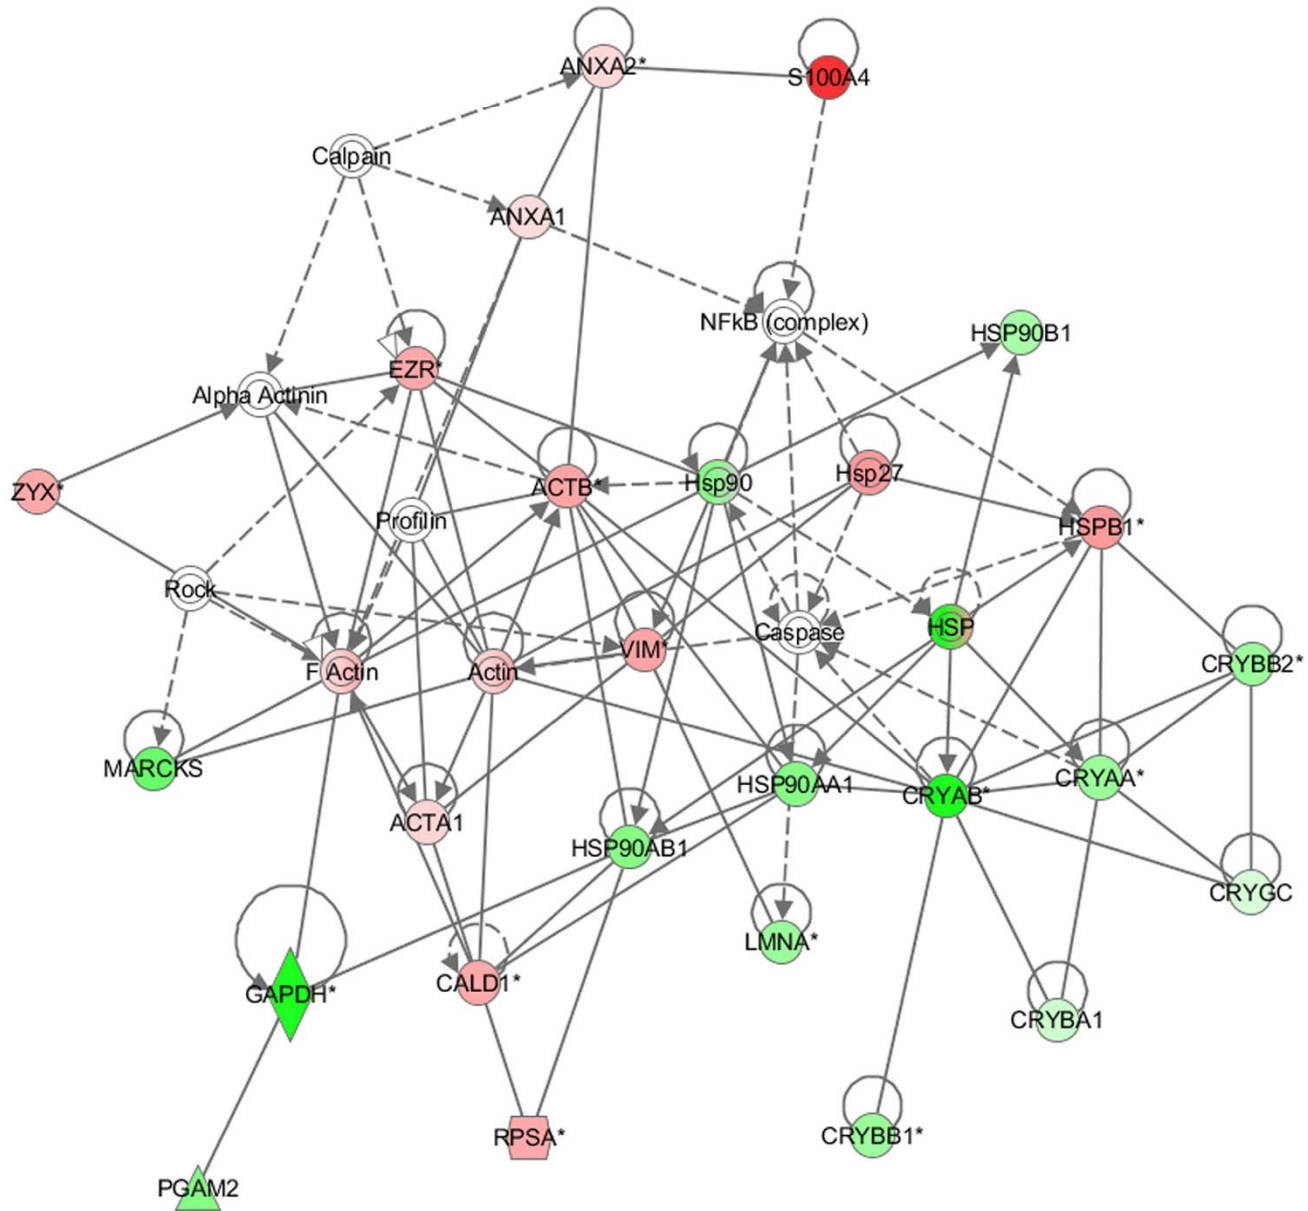

Red = increased Green = decreased

# Network # 2

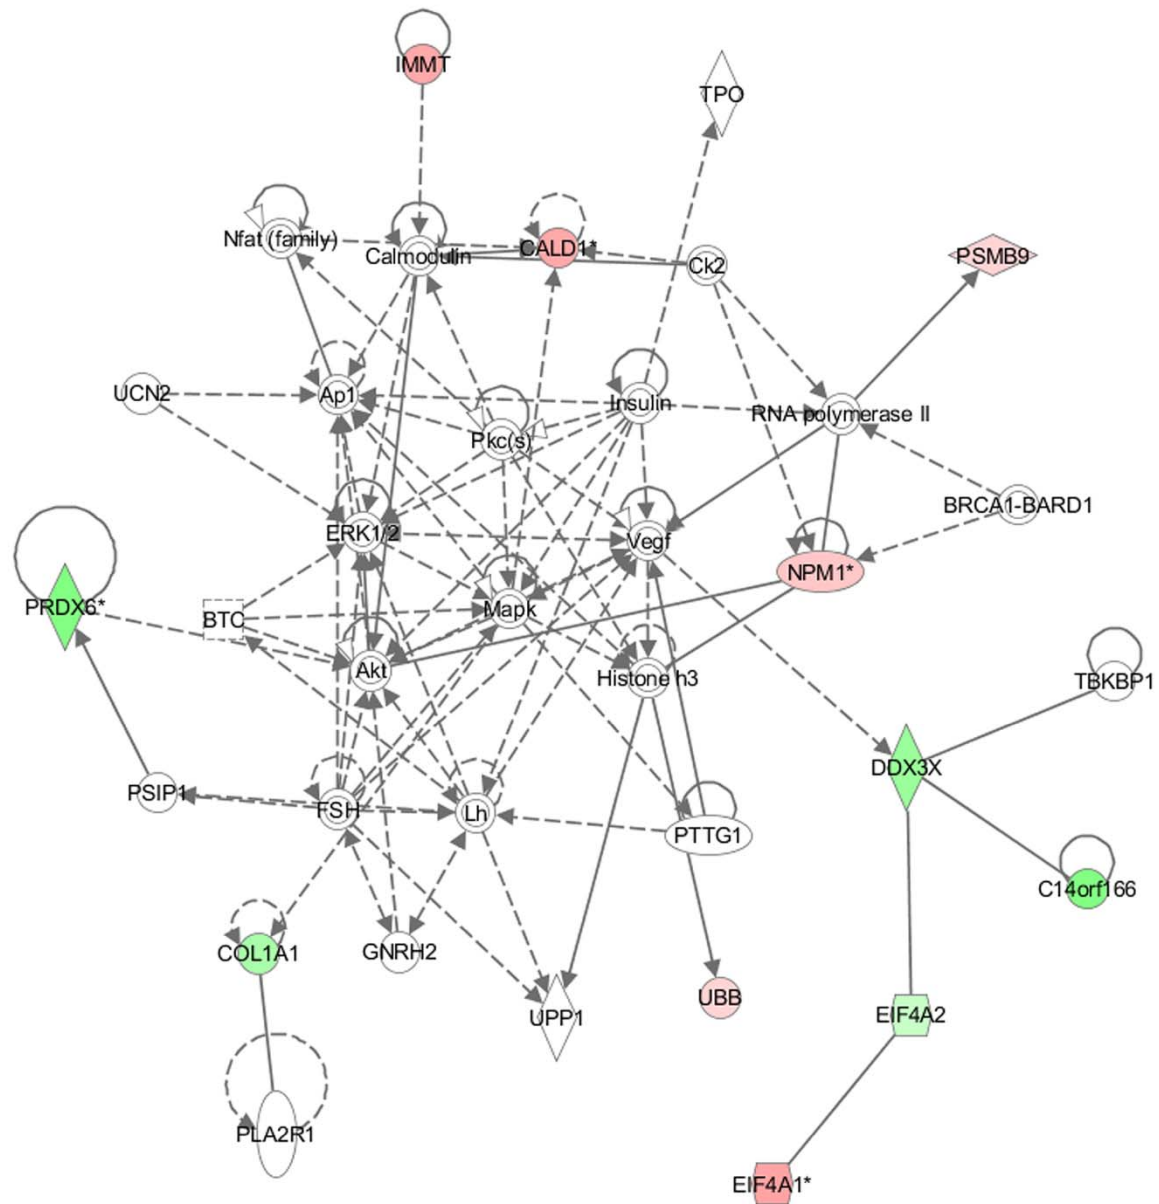

Red = increased Green = decreased

# Network # 3

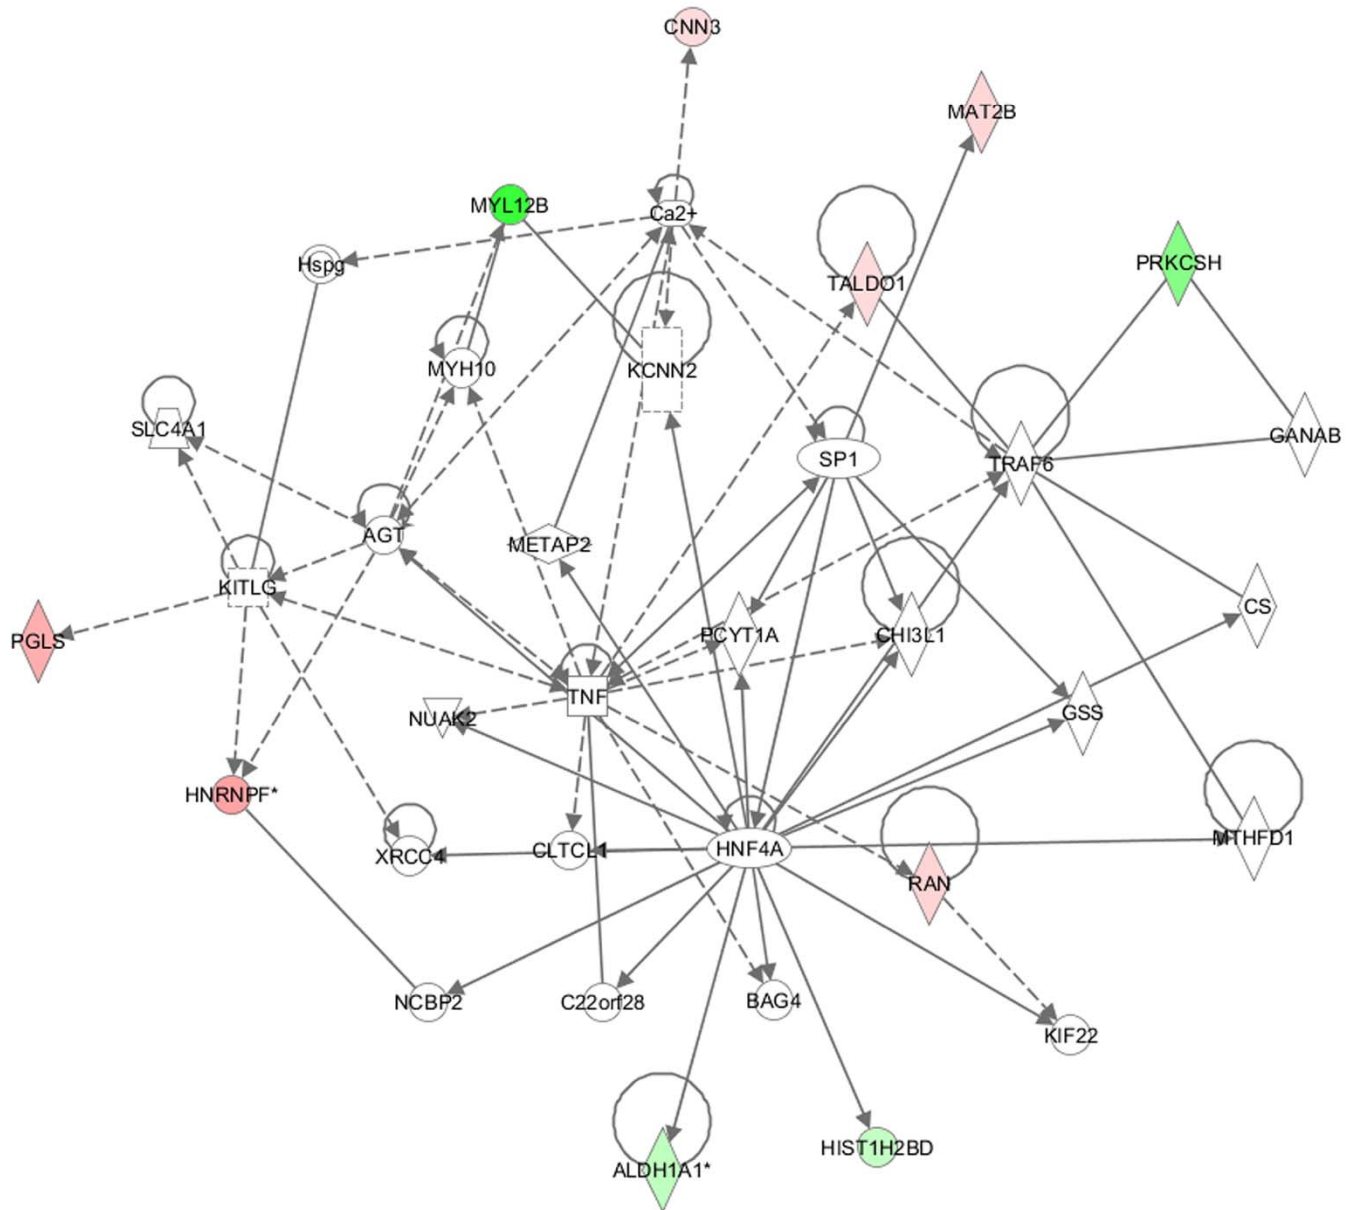

Red = increased Green = decreased

# Network # 4

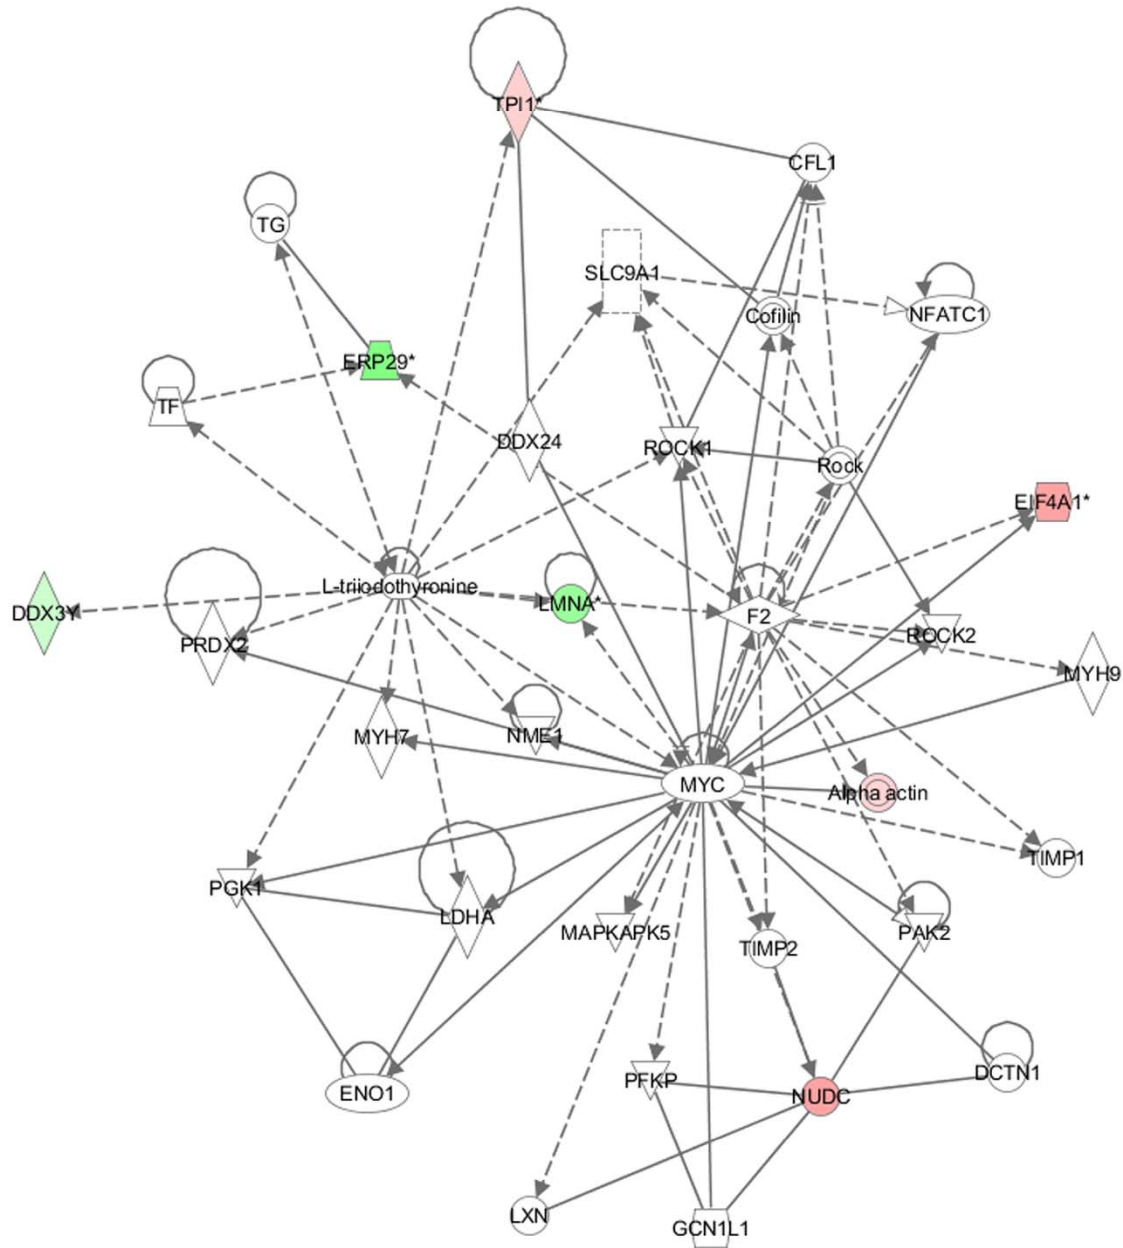

Red = increased Green = decreased
