# Supplementary material
Source: PubMed Central journal article supplement (PMC3208141)
Supplement: 11-7633_z7g999112030st1.pdf [file 11-7633_z7g999112030st1.pdf]

| Symbol        | Entrez Gene Name                                                | GI Number | Fold Change | Networks | Location            | Type(s)                                        | Biomarker Application(s)                                                                              | Drug(s)                                 |
|---------------|-----------------------------------------------------------------|-----------|-------------|----------|---------------------|------------------------------------------------|-------------------------------------------------------------------------------------------------------|-----------------------------------------|
| ACTA1         | actin, alpha 1, skeletal muscle                                 | 4501881   | 2.090       | 1        | Cytoplasm           | other                                          |                                                                                                       |                                         |
| ACTB          | actin, beta                                                     | 14250401  | 4.440       | 1        | Cytoplasm           | other                                          |                                                                                                       |                                         |
| Actin         | --                                                              | --        | --          | 1        | Cytoplasm           | group                                          | Response to Therapy                                                                                   |                                         |
| AGT           | angiotensinogen (serpin peptidase inhibitor, clade A, member 8) | --        | --          | 3        | Extracellular Space | other                                          | Efficacy<br>Diagnosis, Disease<br>Progression, Efficacy,<br>Prognosis, Response to<br>Therapy, Safety |                                         |
| Akt           | --                                                              | --        | --          | 2        | Cytoplasm           | group                                          | Diagnosis, Disease<br>Progression                                                                     | disulfiram,<br>chlorpropamide           |
| ALDH1A1       | aldehyde dehydrogenase 1 family, member A1                      | 2183299   | -2.140      | 3        | Cytoplasm           | enzyme                                         |                                                                                                       |                                         |
| Alpha actin   | --                                                              | --        | --          | 4        | Cytoplasm           | group                                          |                                                                                                       |                                         |
| Alpha Actinin | --                                                              | --        | --          | 1        | Cytoplasm           | group                                          |                                                                                                       |                                         |
| ANXA1         | annexin A1                                                      | 4502101   | 1.750       | 1        | Plasma Membrane     | other                                          | Diagnosis, Prognosis,<br>Unspecified Application                                                      |                                         |
| ANXA2         | annexin A2                                                      | 16306978  | 1.950       | 1        | Plasma Membrane     | other                                          | Diagnosis, Unspecified<br>Application                                                                 |                                         |
| Ap1           | --                                                              | --        | --          | 2        | Nucleus             | complex                                        |                                                                                                       |                                         |
| BAG4          | BCL2-associated athanogene 4                                    | --        | --          | 3        | Cytoplasm           | other                                          |                                                                                                       |                                         |
| BRCA1-        | --                                                              | --        | --          | --       | --                  | --                                             |                                                                                                       |                                         |
| BARD1         | --                                                              | --        | --          | 2        | Nucleus             | complex                                        |                                                                                                       |                                         |
| BTC           | betacellulin                                                    | --        | --          | 2        | Extracellular Space | growth factor                                  |                                                                                                       |                                         |
| C14orf166     | chromosome 14 open reading frame 166                            | 55613379  | -4.110      | 2        | Nucleus             | other                                          |                                                                                                       |                                         |
| C22orf28      | chromosome 22 open reading frame 28                             | --        | --          | 3        | unknown             | other<br>chemical -<br>endogenous<br>mammalian |                                                                                                       |                                         |
| Ca2+          | --                                                              | --        | --          | 3        | unknown             | other                                          |                                                                                                       |                                         |
| CALD1         | caldesmon 1                                                     | 15149465  | 4.190       | 1, 2     | Cytoplasm           | other                                          |                                                                                                       |                                         |
| Calmodulin    | --                                                              | --        | --          | 2        | Cytoplasm           | group                                          |                                                                                                       |                                         |
| Calpain       | --                                                              | --        | --          | 1        | Cytoplasm           | complex                                        |                                                                                                       |                                         |
| Caspase       | --                                                              | --        | --          | 1        | Cytoplasm           | group                                          | Efficacy                                                                                              |                                         |
| CFL1          | cofilin 1 (non-muscle)                                          | --        | --          | 4        | Nucleus             | other                                          | Diagnosis, Efficacy,<br>Prognosis                                                                     |                                         |
| CHI3L1        | chitinase 3-like 1 (cartilage glycoprotein-39)                  | --        | --          | 3        | Extracellular Space | enzyme                                         |                                                                                                       |                                         |
| Ck2           | --                                                              | --        | --          | 2        | Cytoplasm           | complex                                        |                                                                                                       |                                         |
| CLTCL1        | clathrin, heavy chain-like 1                                    | --        | --          | 3        | Plasma Membrane     | other                                          | Disease Progression                                                                                   |                                         |
| CNN3          | calponin 3, acidic                                              | 4502923   | 1.750       | 3        | Cytoplasm           | other                                          |                                                                                                       |                                         |
| Cofilin       | --                                                              | --        | --          | 4        | Cytoplasm           | group                                          |                                                                                                       |                                         |
| COL1A1        | collagen, type I, alpha 1                                       | 1418928   | -2.860      | 2        | Extracellular Space | other                                          | Diagnosis                                                                                             | collagenase<br>clostridium histolyticum |
| CRYAA         | crystallin, alpha A                                             | 4503055   | -3.380      | 1        | Nucleus             | other                                          |                                                                                                       |                                         |

| Symbol     | Entrez Gene Name                                              | GI Number | Fold Change | Networks | Location            | Type(s)               | Biomarker Application(s)                                           | Drug(s)                                                                                            |
|------------|---------------------------------------------------------------|-----------|-------------|----------|---------------------|-----------------------|--------------------------------------------------------------------|----------------------------------------------------------------------------------------------------|
| CRYAB      | crystallin, alpha B                                           | 4503057   | -7.490      | 1        | Nucleus             | other                 | Diagnosis, Disease Progression, Prognosis, Unspecified Application |                                                                                                    |
| CRYBA1     | crystallin, beta A1                                           | 12056461  | -1.730      | 1        | unknown             | other                 |                                                                    |                                                                                                    |
| CRYBB1     | crystallin, beta B1                                           | 4503061   | -3.380      | 1        | unknown             | other                 |                                                                    |                                                                                                    |
| CRYBB2     | crystallin, beta B2                                           | 4503063   | -3.380      | 1        | unknown             | other                 |                                                                    |                                                                                                    |
| CRYGC      | crystallin, gamma C                                           | 10518338  | -1.370      | 1        | Cytoplasm           | other                 |                                                                    |                                                                                                    |
| CS         | citrate synthase                                              | --        |             | 3        | Cytoplasm           | enzyme                |                                                                    |                                                                                                    |
| DCTN1      | dynactin 1                                                    | --        |             | 4        | Cytoplasm           | other                 |                                                                    |                                                                                                    |
| DDX24      | DEAD (Asp-Glu-Ala-Asp) box polypeptide 24                     | --        |             | 4        | Nucleus             | enzyme                |                                                                    |                                                                                                    |
| DDX3X      | DEAD (Asp-Glu-Ala-Asp) box polypeptide 3, X-linked            | 62087546  | -3.350      | 2        | Nucleus             | enzyme                | Diagnosis                                                          |                                                                                                    |
| DDX3Y      | DEAD (Asp-Glu-Ala-Asp) box polypeptide 3, Y-linked            | 13514809  | -1.700      | 4        | Cytoplasm           | enzyme                |                                                                    |                                                                                                    |
| EIF4A1     | eukaryotic translation initiation factor 4A1                  | 4503529   | 4.440       | 2, 4     | Cytoplasm           | translation regulator |                                                                    |                                                                                                    |
| EIF4A2     | eukaryotic translation initiation factor 4A2                  | 16198386  | -1.850      | 2        | Cytoplasm           | translation regulator |                                                                    |                                                                                                    |
| ENO1       | enolase 1, (alpha)                                            | --        |             | 4        | Cytoplasm           | regulator             | Diagnosis                                                          |                                                                                                    |
| ERK1/2     | --                                                            | --        |             | 2        | Cytoplasm           | group                 |                                                                    |                                                                                                    |
| ERP29      | endoplasmic reticulum protein 29                              | 5803013   | -4.110      | 4        | Cytoplasm           | transporter           |                                                                    |                                                                                                    |
| EZR        | ezrin                                                         | 46249758  | 4.190       | 1        | Plasma Membrane     | other                 | Prognosis                                                          |                                                                                                    |
| F Actin    | --                                                            | --        |             | 1        | Cytoplasm           | complex               |                                                                    |                                                                                                    |
| F2         | coagulation factor II (thrombin)                              | --        |             | 4        | Extracellular Space | peptidase             | Diagnosis                                                          | enoxaparin, desirudin, dabigatran etexilate, antithrombin alfa, argatroban, bivalirudin, lepirudin |
| FSH        | --                                                            | --        |             | 2        | Plasma Membrane     | complex               |                                                                    |                                                                                                    |
| GANAB      | glucosidase, alpha; neutral AB                                | --        |             | 3        | Cytoplasm           | enzyme                |                                                                    |                                                                                                    |
| GAPDH      | glyceraldehyde-3-phosphate dehydrogenase                      | 31645     | -7.490      | 1        | Cytoplasm           | enzyme                | Diagnosis, Disease Progression, Unspecified Application            |                                                                                                    |
| GCN1L1     | GCN1 general control of amino-acid synthesis 1-like 1 (yeast) | --        |             | 4        | Cytoplasm           | translation regulator |                                                                    |                                                                                                    |
| GNRH2      | gonadotropin-releasing hormone 2                              | --        |             | 2        | Extracellular Space | other                 |                                                                    |                                                                                                    |
| GSS        | glutathione synthetase                                        | --        |             | 3        | Cytoplasm           | enzyme                |                                                                    |                                                                                                    |
| HIST1H2BD  | histone cluster 1, H2bd                                       | 10800138  | -1.980      | 3        | Nucleus             | other                 |                                                                    |                                                                                                    |
| Histone h3 | --                                                            | --        |             | 2        | Nucleus             | group                 | Prognosis                                                          |                                                                                                    |
| HNF4A      | hepatocyte nuclear factor 4, alpha                            | --        |             | 3        | Nucleus             | regulator             | Unspecified Application                                            |                                                                                                    |
| HNRNP      | heterogeneous nuclear ribonucleoprotein F                     | 16876910  | 4.440       | 3        | Nucleus             | other                 |                                                                    |                                                                                                    |
| HSP        | --                                                            | --        |             | 1        | Cytoplasm           | group                 |                                                                    |                                                                                                    |

| Symbol             | Entrez Gene Name                                                                          | GI Number | Fold Change | Networks | Location            | Type(s)                         | Biomarker Application(s)                                                     | Drug(s)                                                                 |
|--------------------|-------------------------------------------------------------------------------------------|-----------|-------------|----------|---------------------|---------------------------------|------------------------------------------------------------------------------|-------------------------------------------------------------------------|
| Hsp27              | --                                                                                        | --        |             | 1        | Cytoplasm           | group                           | Prognosis, Unspecified Application                                           |                                                                         |
| Hsp90              | --                                                                                        | --        |             | 1        | Cytoplasm           | group                           |                                                                              |                                                                         |
| HSP90AA1           | heat shock protein 90kDa alpha (cytosolic), class A member 1                              | 154146191 | -4.000      | 1        | Cytoplasm           | other                           | Safety, Unspecified Application                                              | 17-dimethylaminoethylamino-17-demethoxygeldanamycin, IPI-504, cisplatin |
| HSP90AB1           | heat shock protein 90kDa alpha (cytosolic), class B member 1                              | 20149594  | -4.000      | 1        | Cytoplasm           | other                           |                                                                              | 17-dimethylaminoethylamino-17-demethoxygeldanamycin, IPI-504, cisplatin |
| HSP90B1            | heat shock protein 90kDa beta (Grp94), member 1                                           | 15010550  | -2.880      | 1        | Cytoplasm           | other                           |                                                                              | 17-dimethylaminoethylamino-17-demethoxygeldanamycin, IPI-504, cisplatin |
| HSPB1              | heat shock 27kDa protein 1                                                                | 4504517   | 4.890       | 1        | Cytoplasm           | other                           | Diagnosis                                                                    |                                                                         |
| Hspg               | --                                                                                        | --        |             | 3        | Plasma Membrane     | group                           |                                                                              |                                                                         |
| IMMT               | inner membrane protein, mitochondrial                                                     | 154354964 | 4.190       | 2        | Cytoplasm           | other                           |                                                                              |                                                                         |
| Insulin            | --                                                                                        | --        |             | 2        | Extracellular Space | group                           |                                                                              |                                                                         |
| KCNN2              | potassium intermediate/small conductance calcium-activated channel, subfamily N, member 2 | --        |             | 3        | Plasma Membrane     | ion channel                     |                                                                              |                                                                         |
| KIF22              | kinesin family member 22                                                                  | --        |             | 3        | Nucleus             | other                           | Diagnosis, Prognosis                                                         |                                                                         |
| KITLG              | KIT ligand                                                                                | --        |             | 3        | Extracellular Space | growth factor                   | Diagnosis, Efficacy, Unspecified Application                                 |                                                                         |
| LDHA               | lactate dehydrogenase A                                                                   | --        |             | 4        | Cytoplasm           | enzyme                          | Diagnosis, Disease Progression, Efficacy, Prognosis, Unspecified Application |                                                                         |
| Lh                 | --                                                                                        | --        |             | 2        | Plasma Membrane     | complex                         |                                                                              |                                                                         |
| LMNA               | lamin A/C                                                                                 | 27436946  | -3.350      | 1, 4     | Nucleus             | other                           |                                                                              |                                                                         |
| L-triiodothyronine | --                                                                                        | --        |             | 4        | unknown             | chemical - endogenous mammalian | Diagnosis, Efficacy, Safety                                                  |                                                                         |
| LXN                | latexin                                                                                   | --        |             | 4        | Cytoplasm           | other                           |                                                                              |                                                                         |
| Mapk               | --                                                                                        | --        |             | 2        | Cytoplasm           | group                           | Diagnosis, Disease Progression, Efficacy, Prognosis, Response to Therapy     |                                                                         |
| MAPKAPK5           | mitogen-activated protein kinase-activated protein kinase 5                               | --        |             | 4        | Cytoplasm           | kinase                          |                                                                              |                                                                         |
| MARCKS             | myristoylated alanine-rich protein kinase C substrate                                     | 153070260 | -5.000      | 1        | Plasma Membrane     | other                           |                                                                              |                                                                         |
| MAT2B              | methionine adenosyltransferase II, beta                                                   | 11034825  | 1.950       | 3        | Cytoplasm           | enzyme                          |                                                                              |                                                                         |

| Symbol            | Entrez Gene Name                                                                                                                        | GI Number | Fold Change | Networks | Location        | Type(s)                 | Biomarker Application(s)                                                     | Drug(s)  |
|-------------------|-----------------------------------------------------------------------------------------------------------------------------------------|-----------|-------------|----------|-----------------|-------------------------|------------------------------------------------------------------------------|----------|
| METAP2            | methionyl aminopeptidase 2                                                                                                              | --        |             | 3        | Cytoplasm       | peptidase               |                                                                              | PPI-2458 |
| MTHFD1            | methylenetetrahydrofolate dehydrogenase (NADP+ dependent) 1, methenyltetrahydrofolate cyclohydrolase, formyltetrahydrofolate synthetase | --        |             | 3        | Cytoplasm       | enzyme                  | Diagnosis, Efficacy, Prognosis, Response to Therapy, Unspecified Application |          |
| MYC               | v-myc myelocytomatosis viral oncogene homolog (avian)                                                                                   | --        |             | 4        | Nucleus         | transcription regulator | Application                                                                  |          |
| MYH10             | myosin, heavy chain 10, non-muscle                                                                                                      | --        |             | 3        | Cytoplasm       | other                   | Unspecified Application                                                      |          |
| MYH7              | myosin, heavy chain 7, cardiac muscle, beta                                                                                             | --        |             | 4        | Cytoplasm       | enzyme                  | Unspecified Application                                                      |          |
| MYH9              | myosin, heavy chain 9, non-muscle                                                                                                       | --        |             | 4        | Cytoplasm       | enzyme                  |                                                                              |          |
| MYL12B            | myosin, light chain 12B, regulatory                                                                                                     | 15809016  | -6.590      | 3        | Cytoplasm       | other                   |                                                                              |          |
| NBCP2             | nuclear cap binding protein subunit 2, 20kDa                                                                                            | --        |             | 3        | Nucleus         | other                   |                                                                              |          |
| Nfat (family)     | --                                                                                                                                      | --        |             | 2        | Cytoplasm       | group transcription     |                                                                              |          |
| NFATC1            | nuclear factor of activated T-cells, cytoplasmic, calcineurin-dependent 1                                                               | --        |             | 4        | Nucleus         | regulator               |                                                                              |          |
| NFkB (complex)    | --                                                                                                                                      | --        |             | 1        | Nucleus         | complex                 | Diagnosis, Disease Progression, Efficacy, Prognosis                          |          |
| NME1              | non-metastatic cells 1, protein (NM23A) expressed in                                                                                    | --        |             | 4        | Nucleus         | kinase                  |                                                                              |          |
| NPM1              | nucleophosmin (nucleolar phosphoprotein B23, numatrin)                                                                                  | 10835063  | 2.710       | 2        | Nucleus         | transcription regulator | Disease Progression, Unspecified Application                                 |          |
| NUAK2             | NUAK family, SNF1-like kinase, 2                                                                                                        | --        |             | 3        | unknown         | kinase                  |                                                                              |          |
| NUDC              | nuclear distribution gene C homolog (A. nidulans)                                                                                       | 5729953   | 4.440       | 4        | Cytoplasm       | other                   |                                                                              |          |
| PAK2              | p21 protein (Cdc42/Rac)-activated kinase 2                                                                                              | --        |             | 4        | Cytoplasm       | kinase                  | Disease Progression                                                          |          |
| PCYT1A            | phosphate cytidyltransferase 1, choline, alpha                                                                                          | --        |             | 3        | Cytoplasm       | enzyme                  |                                                                              |          |
| PFKP              | phosphofructokinase, platelet                                                                                                           | --        |             | 4        | Cytoplasm       | kinase                  |                                                                              |          |
| PGAM2             | phosphoglycerate mutase 2 (muscle)                                                                                                      | 387016    | -4.110      | 1        | Cytoplasm       | phosphatase             | Unspecified Application                                                      |          |
| PGK1              | phosphoglycerate kinase 1                                                                                                               | --        |             | 4        | Cytoplasm       | kinase                  |                                                                              |          |
| PGLS              | 6-phosphogluconolactonase                                                                                                               | 6912586   | 3.880       | 3        | Cytoplasm       | enzyme                  |                                                                              |          |
| Pkc(s)            | --                                                                                                                                      | --        |             | 2        | Cytoplasm       | group transmembrane     | Efficacy                                                                     |          |
| PLA2R1            | phospholipase A2 receptor 1, 180kDa                                                                                                     | --        |             | 2        | Plasma Membrane | receptor                | Diagnosis                                                                    |          |
| PRDX2             | peroxiredoxin 2                                                                                                                         | --        |             | 4        | Cytoplasm       | enzyme                  |                                                                              |          |
| PRDX6             | peroxiredoxin 6                                                                                                                         | 4758638   | -4.110      | 2        | Cytoplasm       | enzyme                  | Unspecified Application                                                      |          |
| PRKCSH            | protein kinase C substrate 80K-H                                                                                                        | 182855    | -4.000      | 3        | Cytoplasm       | enzyme                  |                                                                              |          |
| Profilin          | --                                                                                                                                      | --        |             | 1        | Cytoplasm       | group                   |                                                                              |          |
| PSIP1             | PC4 and SFRS1 interacting protein 1                                                                                                     | --        |             | 2        | Nucleus         | other                   | Disease Progression                                                          |          |
| PSMB9             | proteasome (prosome, macropain) subunit, beta type, 9 (large multifunctional peptidase 2)                                               | 36059     | 2.070       | 2        | Cytoplasm       | peptidase transcription |                                                                              |          |
| PTTG1             | pituitary tumor-transforming 1                                                                                                          | --        |             | 2        | Nucleus         | regulator               | Prognosis                                                                    |          |
| RAN               | RAN, member RAS oncogene family                                                                                                         | 4092054   | 2.080       | 3        | Nucleus         | enzyme                  |                                                                              |          |
| RNA polymerase II | --                                                                                                                                      | --        |             | 2        | Nucleus         | complex                 |                                                                              |          |

| Symbol | Entrez Gene Name                                                                                            | GI Number | Fold Change | Networks | Location            | Type(s)                             | Biomarker Application(s)                                                                                  | Drug(s)                                                            |
|--------|-------------------------------------------------------------------------------------------------------------|-----------|-------------|----------|---------------------|-------------------------------------|-----------------------------------------------------------------------------------------------------------|--------------------------------------------------------------------|
| Rock   | --                                                                                                          | --        |             | 1, 4     | Cytoplasm           | group                               | Efficacy                                                                                                  |                                                                    |
| ROCK1  | Rho-associated, coiled-coil containing protein kinase 1                                                     | --        |             | 4        | Cytoplasm           | kinase                              |                                                                                                           |                                                                    |
| ROCK2  | Rho-associated, coiled-coil containing protein kinase 2                                                     | --        |             | 4        | Cytoplasm           | kinase                              |                                                                                                           |                                                                    |
| RPSA   | ribosomal protein SA                                                                                        | 250127    | 4.120       | 1        | Cytoplasm           | translation regulator               |                                                                                                           |                                                                    |
| S100A4 | S100 calcium binding protein A4                                                                             | 4506765   | 9.970       | 1        | Cytoplasm           | other                               | Disease Progression                                                                                       |                                                                    |
| SLC4A1 | solute carrier family 4, anion exchanger, member 1 (erythrocyte membrane protein band 3, Diego blood group) | --        |             | 3        | Plasma Membrane     | transporter                         |                                                                                                           | amiloride, amiloride/hydrochlorothiazide                           |
| SLC9A1 | solute carrier family 9 (sodium/hydrogen exchanger), member 1                                               | --        |             | 4        | Plasma Membrane     | ion channel transcription regulator |                                                                                                           |                                                                    |
| SP1    | Sp1 transcription factor                                                                                    | --        |             | 3        | Nucleus             | regulator                           |                                                                                                           |                                                                    |
| TALDO1 | transaldolase 1                                                                                             | 48257056  | 1.750       | 3        | Cytoplasm           | enzyme                              |                                                                                                           |                                                                    |
| TBKBP1 | TBK1 binding protein 1                                                                                      | --        |             | 2        | unknown             | other                               |                                                                                                           |                                                                    |
| TF     | transferrin                                                                                                 | --        |             | 4        | Extracellular Space | transporter                         | Efficacy, Prognosis                                                                                       |                                                                    |
| TG     | thyroglobulin                                                                                               | --        |             | 4        | Extracellular Space | other                               | Diagnosis, Unspecified Application                                                                        |                                                                    |
| TIMP1  | TIMP metalloproteinase inhibitor 1                                                                          | --        |             | 4        | Extracellular Space | other                               | Diagnosis, Disease Progression, Efficacy, Prognosis, Unspecified Application                              |                                                                    |
| TIMP2  | TIMP metalloproteinase inhibitor 2                                                                          | --        |             | 4        | Extracellular Space | other                               | Efficacy, Prognosis, Unspecified Application                                                              |                                                                    |
| TNF    | tumor necrosis factor                                                                                       | --        |             | 3        | Extracellular Space | cytokine                            | Diagnosis, Disease Progression, Efficacy, Prognosis, Safety, Unspecified Application                      | adalimumab, etanercept, infliximab, CDP870, golimumab, thalidomide |
| TPI1   | triosephosphate isomerase 1                                                                                 | 17389815  | 2.270       | 4        | Cytoplasm           | enzyme                              | Diagnosis, Unspecified Application                                                                        |                                                                    |
| TPO    | thyroid peroxidase                                                                                          | --        |             | 2        | Plasma Membrane     | enzyme                              |                                                                                                           | propylthiouracil, methimazole                                      |
| TRAF6  | TNF receptor-associated factor 6                                                                            | --        |             | 3        | Cytoplasm           | enzyme                              |                                                                                                           |                                                                    |
| UBB    | ubiquitin B                                                                                                 | 11024714  | 2.080       | 2        | unknown             | other                               |                                                                                                           |                                                                    |
| UCN2   | urocortin 2                                                                                                 | --        |             | 2        | Extracellular Space | other                               |                                                                                                           |                                                                    |
| UPP1   | uridine phosphorylase 1                                                                                     | --        |             | 2        | Cytoplasm           | enzyme                              | Prognosis                                                                                                 |                                                                    |
| Vegf   | --                                                                                                          | --        |             | 2        | Cytoplasm           | group                               | Diagnosis, Disease Progression, Efficacy, Prognosis, Response to Therapy, Safety, Unspecified Application |                                                                    |
| VIM    | vimentin                                                                                                    | 62414289  | 4.440       | 1        | Cytoplasm           | other                               | Diagnosis, Efficacy, Prognosis                                                                            |                                                                    |
| XRCC4  | X-ray repair complementing defective repair in Chinese hamster cells 4                                      | --        |             | 3        | Nucleus             | other                               |                                                                                                           |                                                                    |

| Symbol | Entrez Gene Name | GI Number | Fold Change | Networks | Location        | Type(s) | Biomarker Application(s) | Drug(s) |
|--------|------------------|-----------|-------------|----------|-----------------|---------|--------------------------|---------|
| ZYX    | zyxin            | 33870614  | 4.190       | 1        | Plasma Membrane | other   |                          |         |

**Legend to Supplementary Table S1.** Comprehensive information on proteins analyzed by Ingenuity Pathways software. Protein symbols, gene names, Gi numbers, fold change by UVB, and network location are provided for proteins that were changed by UVB irradiation (shaded rows). The cellular distribution and biomarker application of the proteins, if known, is also shown.
